# Supplementary material
Source: MDPI journal article supplement (https://www.mdpi.com/1996-1073/16/6/2725)
Supplement: s1 [file s1]

## Supplementary Information

**Table S1. Life-cycle GHG emission factors associated with different inputs and processes**

| Input/Activity                                                             | GWP   | References                          |
|----------------------------------------------------------------------------|-------|-------------------------------------|
| Nitrogen (kgCO <sub>2</sub> e per kg of N)                                 | 6.89  | (Liang et al., 2021)                |
| Phosphorous (kgCO <sub>2</sub> e per kg of P <sub>2</sub> O <sub>5</sub> ) | 0.67  |                                     |
| Potassium (kgCO <sub>2</sub> e per kg of K)                                | 0.65  |                                     |
| Lime (kgCO <sub>2</sub> e per kg of input)                                 | 0.015 |                                     |
| Herbicides (kgCO <sub>2</sub> e per kg of input)                           | 16.35 |                                     |
| Machine (kgCO <sub>2</sub> e per kg of input)                              | 1.58  | (Argonne National Laboratory, 2020) |
| Diesel (kgCO <sub>2</sub> e per liter)                                     | 2.73  |                                     |
| Electricity (kgCO <sub>2</sub> e per kwh)                                  | 0.61  |                                     |
| Gasoline (gCO <sub>2</sub> e per MJ)                                       | 94    |                                     |
| Feedstock transportation (kgCO <sub>2</sub> e per ton per km)              | 0.20  | (Masum et al., 2020)                |
| Rice cultivation (mg CH <sub>4</sub> /(m <sup>2</sup> * h))                | 9.28  | (Liang et al., 2021)                |
| Soil carbon loss-corn stover (kg CO <sub>2</sub> e/MT stover)              | 103   | (Zhao et al., 2016)                 |
| Soil carbon loss-wheat straw (kg CO <sub>2</sub> e/MT straw)               | 312   | (Jin et al., 2020)                  |
| Soil carbon loss-rice straw (kg CO <sub>2</sub> e/MT straw)                | 312   |                                     |
| Biomass preprocessing (kgCO <sub>2</sub> e/MT biomass)                     | 51.89 | (Obnamia et al., 2019)              |
| Biomass burning for electricity (kgCO <sub>2</sub> e/MT biomass)           | 34.4  | (WDNR, 2010)                        |

**Table S2. Domestic demand elasticities of crop commodities**

| Commodity | Elasticity |
|-----------|------------|
| Corn      | -0.40      |
| Soybeans  | -0.65      |
| Wheat     | -0.40      |
| Cotton    | -0.55      |
| Peanuts   | -0.70      |
| Rice      | -0.35      |
| Rapeseed  | -0.70      |

Notes: This table shows the commodities that can be used for domestic consumption. Data source: Huang et al. (2007).

**Table S3: Cost parameters for straw-based biomass (source: Zhang et al. (2013))**

| Input/Activity                       |                          | Corn stover | Rice straw | Wheat straw | Rapeseed straw |
|--------------------------------------|--------------------------|-------------|------------|-------------|----------------|
| Extra fertilizer application (\$/MT) | Nitrogen                 | 2.22        | 4.43       | 3.08        | 1.70           |
|                                      | Phosphorous              | 0.32        | 0.57       | 0.74        | 0.16           |
|                                      | Potassium                | 1.59        | 2.42       | 2.89        | 0.34           |
| Collection (\$/MT)                   |                          | 10.99       | 10.99      | 10.99       | 10.99          |
| Processing and storing (\$/MT)       |                          | 14          | 14         | 14          | 14             |
| Transportation                       | Fixed cost (\$/MT)       | 1.82        | 1.82       | 1.82        | 1.82           |
|                                      | Variable cost (\$/MT/Km) | 0.09        | 0.09       | 0.09        | 0.09           |

**Table S4. Economic model validation for year 2020.**

|                               | Observed  | Model     | Difference (%) |
|-------------------------------|-----------|-----------|----------------|
| Corn acreage (1000 ha)        | 516.124   | 489.931   | -5.1%          |
| Wheat acreage (1000 ha)       | 2311.42   | 2357.255  | 2.0%           |
| Rice acreage (1000 ha)        | 2178.884  | 2155.573  | -1.1%          |
| Soybean acreage (1000 ha)     | 196.372   | 188.825   | -3.8%          |
| Rapeseed acreage (1000 ha)    | 171.413   | 172.582   | 0.7%           |
| Corn Production (1000 MT)     | 3083.028  | 3119.996  | 1.2%           |
| Wheat Production (1000 MT)    | 13338.69  | 13033.287 | -2.3%          |
| Rice production (1000 MT)     | 19657.043 | 20143.569 | 2.5%           |
| Soybean production (1000 MT)  | 519.345   | 525.531   | 1.2%           |
| Rapeseed production (1000 MT) | 512.074   | 518.012   | 1.2%           |
| Corn price (\$/MT)            | 333.333   | 320.1     | -4.0%          |
| Wheat price (\$/MT)           | 339.394   | 332.035   | -2.2%          |
| Rice price (\$/MT)            | 356.678   | 367.728   | 3.1%           |
| Soybean price (\$/MT)         | 666.667   | 680.844   | 2.1%           |
| Rapeseed price (\$/MT)        | 636.364   | 632.208   | -0.7%          |

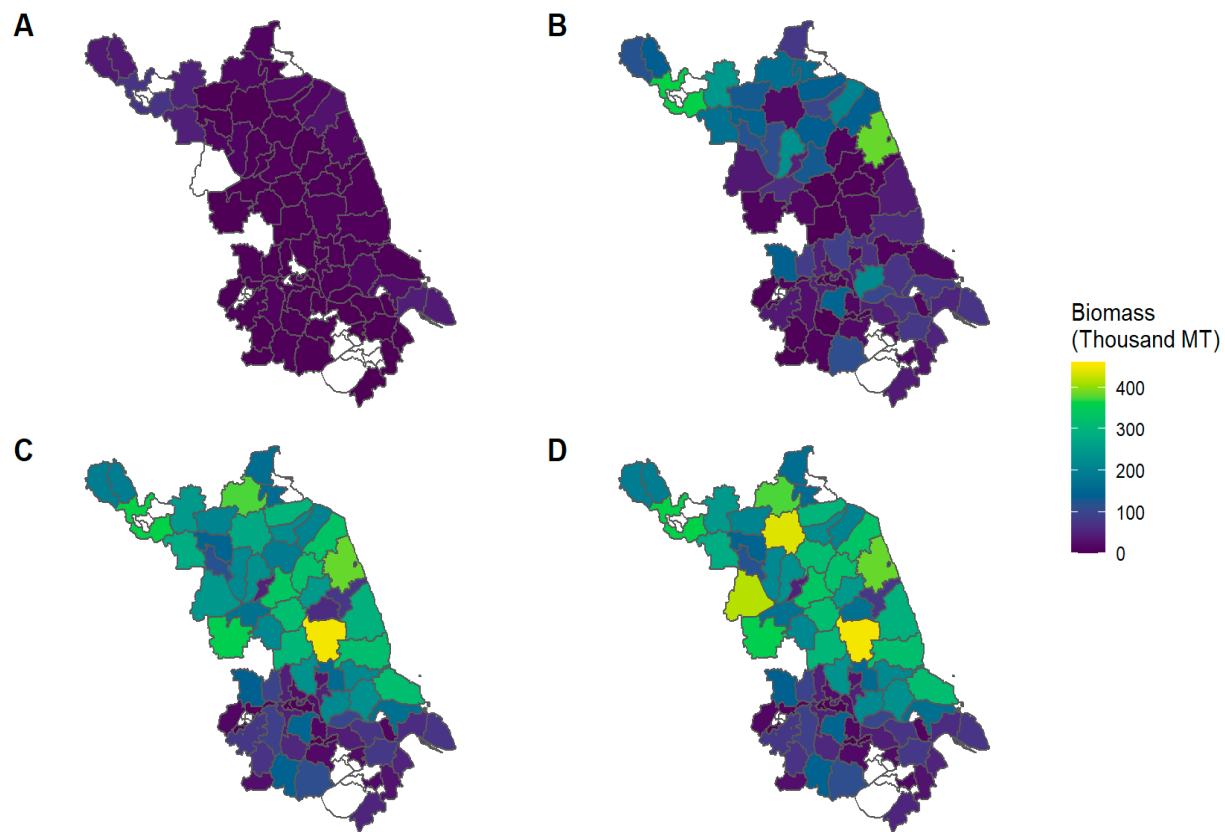

**Figure S1. Spatial distribution of feedstock production for alternative levels of biomass price with 20% co-firing rate. (A) \$50/MT; (B) \$60/MT; (C) \$70/MT; (D) \$80/MT.**

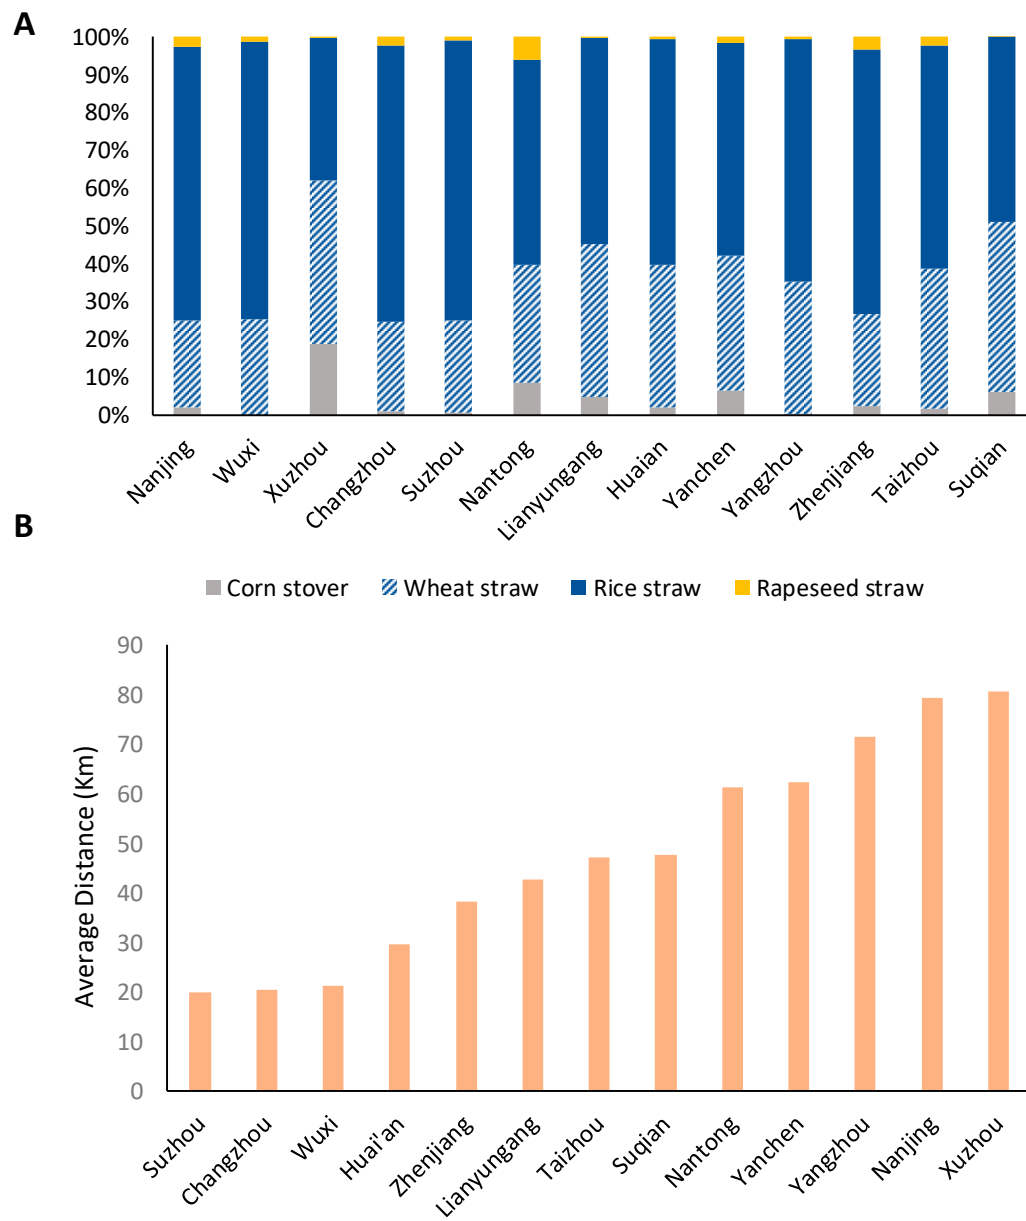

**Figure S2. Biomass supply mix and average biomass hauling distances by co-firing facilities located in 13 cities at \$80/MT biomass price and 20% co-firing level.**
